# Supplementary material
Source: PubMed Central journal article supplement (PMC2481548)
Supplement: blood-2007-11-122598_1.pdf [file blood-2007-11-122598_1.pdf]

| <i>Donor</i> |         | <i>IL-10</i> | <i>IFN<math>\gamma</math></i> | <i>TNF<math>\alpha</math></i> | <i>IL-8</i>    | <i>IL-1<math>\beta</math></i> | <i>IL-12</i> | <i>IL-13</i> | <i>MCP-1</i> | <i>MIP-1<math>\alpha</math></i> | <i>GroA</i> |
|--------------|---------|--------------|-------------------------------|-------------------------------|----------------|-------------------------------|--------------|--------------|--------------|---------------------------------|-------------|
| #1           | Vehicle | 6.5          | 33.0                          | 383.0                         | 620.0          | 17.0                          | 25.0         | 182.0        | 1220.0       | 90500                           | 30.0        |
|              | RvE1    | 8.5          | 30.0                          | <b>307.0</b>                  | <b>300.0</b>   | 19.0                          | 25.0         | 145.0        | 1150.0       | 87200                           | 20.0        |
| #2           | Vehicle | 2.2          | 2.7                           | 15.1                          | 4294.8         | 1.7                           | 1.2          | 7.8          | 3354.5       | 250.7                           | 85.4        |
|              | RvE1    | 2.6          | 3.1                           | <b>6.8</b>                    | <b>3480.9</b>  | 1.8                           | 1.2          | 7.8          | 2843.9       | 263.6                           | 81.0        |
| #3           | Vehicle | 72.4         | 3.9                           | 6910.9                        | 31520.9        | 0.8                           | 1.2          | 7.8          | 493.4        | 207.3                           | 82.7        |
|              | RvE1    | 72.7         | 5.6                           | <b>6358.7</b>                 | <b>20295.3</b> | 0.8                           | 1.2          | 7.8          | 486.2        | 226.5                           | 105.7       |

Healthy human whole blood anticoagulated with heparin was incubated with RvE1 (100 nM) or vehicle in a water bath at 37°C. Incubations were stopped at 4 h and plasma was immediately collected (centrifugation at 2000 rpm, 15 min, 4°C). Plasma aliquots were analyzed for specific chemokines and cytokines using SearchLight Proteome Array. RvE1 blocked IL-8 and TNF $\alpha$  (bold) levels in human whole blood. Cytokine levels are expressed as pg/ml for n=3, separate donors.
